# Supplementary material for: Metagenomic analysis of herbivorous mammalian viral communities in the Northwest Plateau
Source: PubMed Central journal article supplement (PMC10521573; doi:10.1186/s12864-023-09646-1), 2023-09-25
Supplement: 12864_2023_9646_MOESM1_ESM.pdf [file 12864_2023_9646_MOESM1_ESM.pdf]

# PC1 (73.69%) vs PC2 (16.53%)

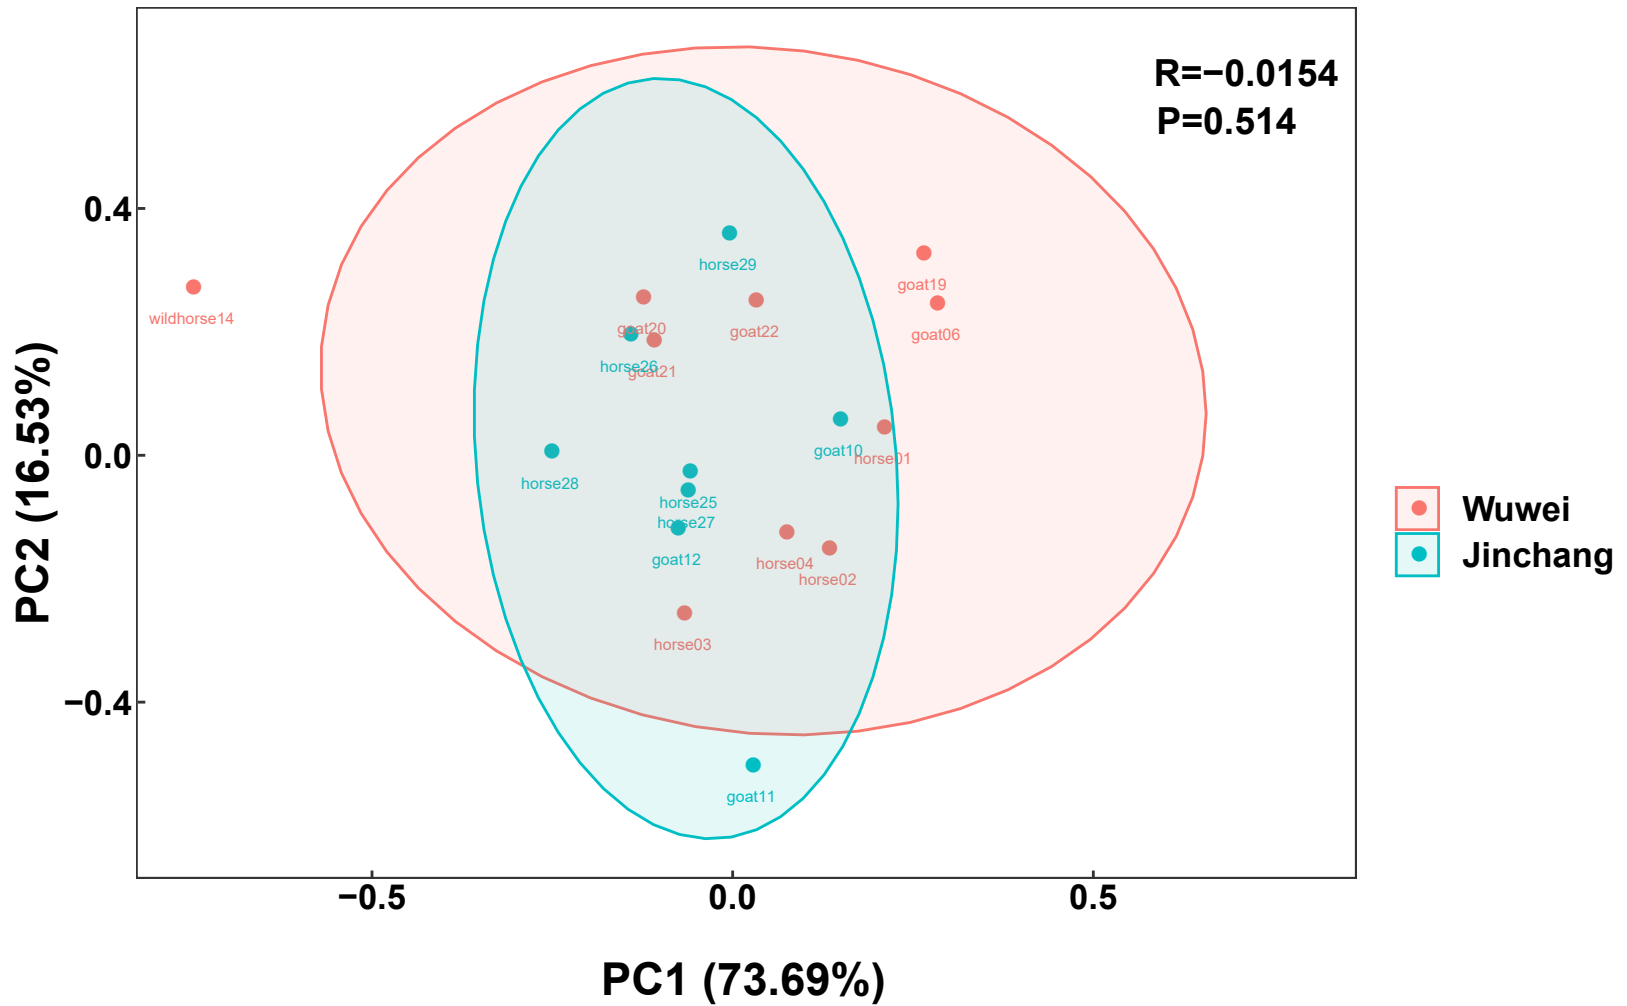

**Supplementary Figure 1.** PCoA plot of goat and horse of two regions.

PCoA plot showing the similarity of viral community structures of goat and horse at each sampling location.
