# Supplementary material for: Metagenomic analysis of herbivorous mammalian viral communities in the Northwest Plateau
Source: PubMed Central journal article supplement (PMC10521573; doi:10.1186/s12864-023-09646-1), 2023-09-25
Supplement: 12864_2023_9646_MOESM2_ESM.pdf [file 12864_2023_9646_MOESM2_ESM.pdf]

## Accumulation curve

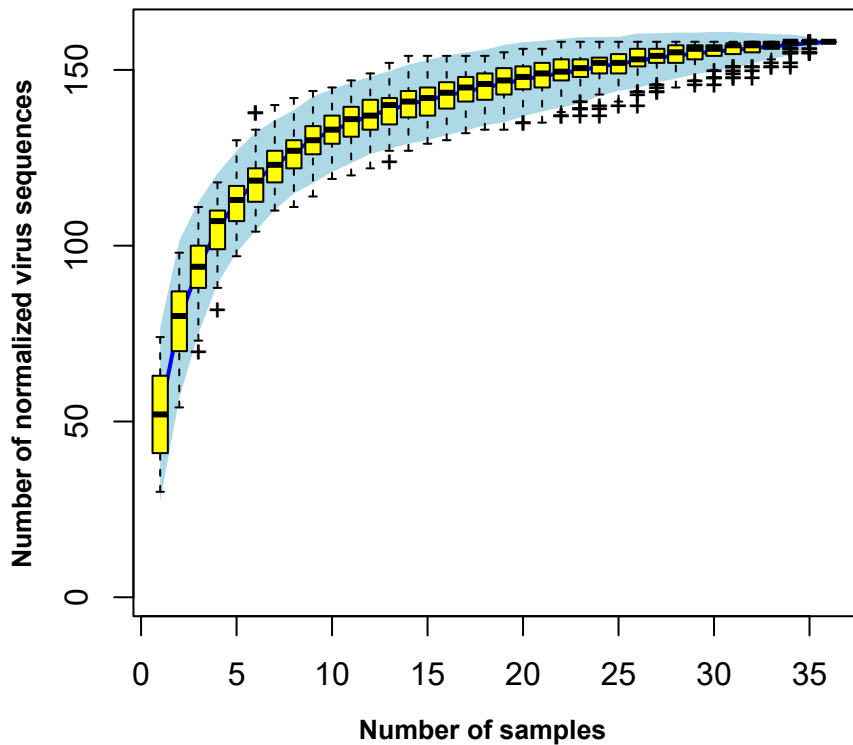

**Supplementary Figure 2.** The accumulation curve of 36 libraries of this study
