# Supplementary material for: Metagenomic analysis of herbivorous mammalian viral communities in the Northwest Plateau
Source: PubMed Central journal article supplement (PMC10521573; doi:10.1186/s12864-023-09646-1), 2023-09-25
Supplement: 12864_2023_9646_MOESM3_ESM.pdf [file 12864_2023_9646_MOESM3_ESM.pdf]

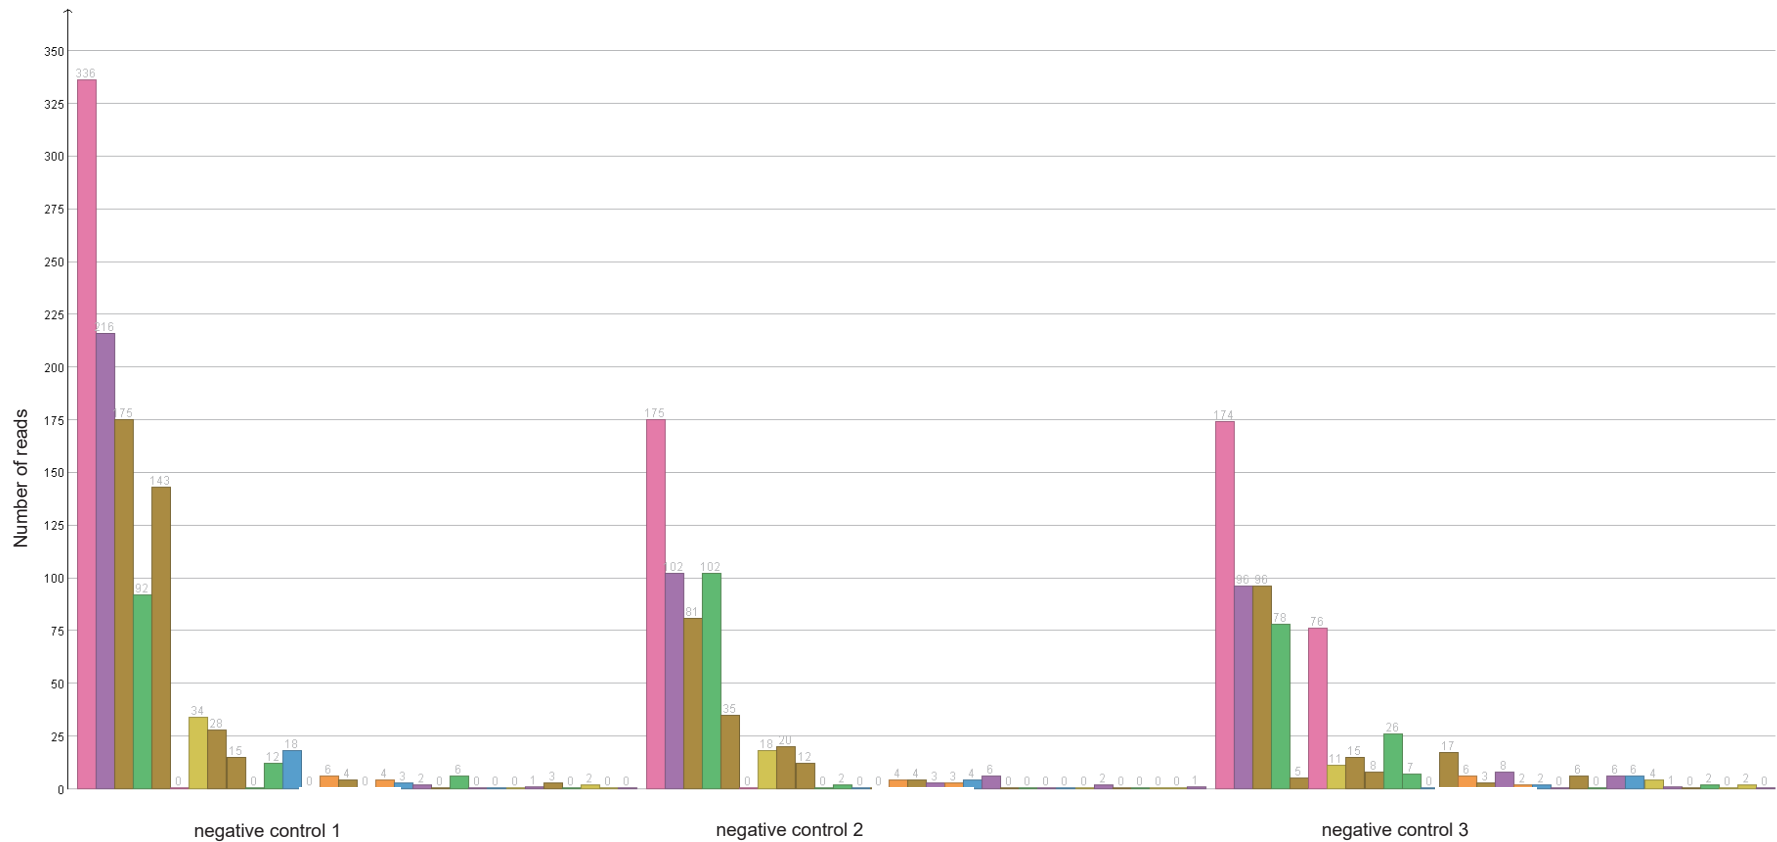

Legend 0:

Siphoviridae Myoviridae Podoviridae Microviridae Parvoviridae Virgaviridae Circoviridae Phycodnaviridae Autographiviridae Betaflexiviridae Mimiviridae Flaviviridae Inoviridae Herelleviridae Ackermannviridae Genomoviridae Demereviridae Retroviridae Iridoviridae  
 Alphaflexiviridae Marsellieviridae Smacoviridae Tombusviridae Potyviridae Powiridae Pithoviridae Drexelviridae Nudiviridae Sphaerolipoviridae Lipothxviridae

**Supplementary Figure 3.** Viral reads of each family of three negative controls. The abundance was shown as the actual number of viral reads in each negative control library.
